# Supplementary material
Source: Springer Nature journal article supplement (https://www.springermedizin.de/resource/supplementary/12936_2014_3176_MOESM6_ESM.pdf/9545226)

Observed:

Luangwa

○

Nyimba

●

Generalized linear mixed model fit (Table 1):

—

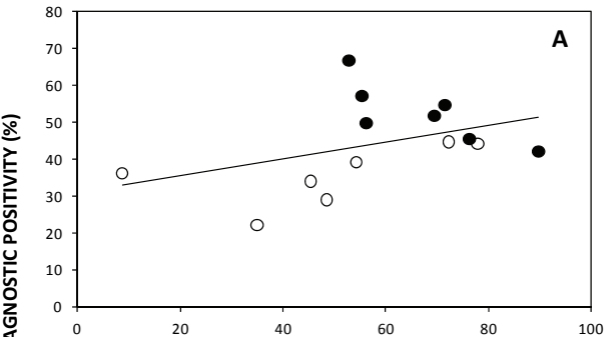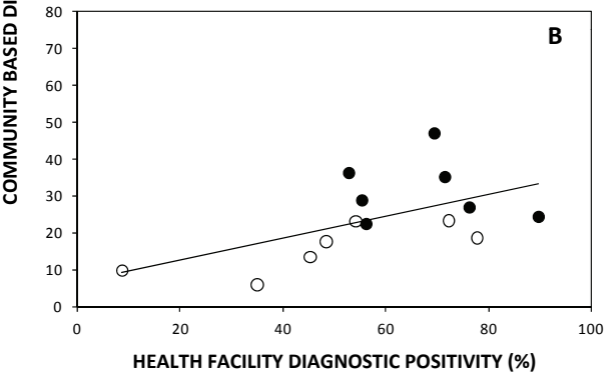

Supplement: MOESM6 [file 9545226]
